# Supplementary material for: Multi-Locus Phylogeographic and Population Genetic Analysis of Anolis carolinensis: Historical Demography of a Genomic Model Species
Source: PLoS One. 2012 Jun 7;7(6):e38474. doi: 10.1371/journal.pone.0038474 (PMC3369884; doi:10.1371/journal.pone.0038474)
Supplement: Table S2 — Predicted protein products for the intronic sequences used in this study. (XLS) [file pone.0038474.s003.xls]

## Sheet: Sheet1
Locus	Gene product
RALGAPA	ral GTPase-activating protein subunit alpha-1 isoform 1
HMGCS	hydroxymethylglutaryl-CoA synthase cytoplasmic
TERT	telomerase reverse transcriptase
MON2	MON2 homolog
