# Supplementary material for: Multi-Locus Phylogeographic and Population Genetic Analysis of Anolis carolinensis: Historical Demography of a Genomic Model Species
Source: PLoS One. 2012 Jun 7;7(6):e38474. doi: 10.1371/journal.pone.0038474 (PMC3369884; doi:10.1371/journal.pone.0038474)
Supplement: Table S3 — Primers for PCR products used in this study. (XLS) [file pone.0038474.s004.xls]

## Sheet: Sheet1
Locus	Orientation	Oligo
ND2	Forward	AAGCTTTCGGGCCCATACC
	Reverse	GCGAATGGAAGCCCGCTGG
RALGAPA	Forward	CGTGAAGGTGTACGTCTTTTCC
	Reverse	GATCATCTTGTCCTTTATCTCCTGA
HGMCS	Forward	TTCAGGATTTGCTGCTACCC
	Reverse	TGTCTAAGCATCATGTTTTCTGC
TERT	Forward	TTTTCTGCCGCAGGTATTTC
	Reverse	TGGATGGTTCTGTCACTTCCT
MON2	Forward	ACATTCTGCCCCTGTATGGA
	Reverse	AGGTTCCTTGCCTCCTCATT
C1	Forward	GGGTGAATCTTCCCTCCTTC
	Reverse	AGGCCCGAGATTCAATGATA
R1	Forward	CATGCCTTTCCAAAAATCGT
	Reverse	CACCAGCCCCTACCAAAATA
Gav1	Forward	CCCCAGGAAATGAGATTCAA
	Reverse	AAAGTGCTGCAGGGCTTAAA
Gav3	Forward	GCCTTCTGGCTTTCTCACAC
	Reverse	TTTTGCCTTCCAAATCCAAG
Gav4	Forward	TGATTCCAACTGCGAGACAG
	Reverse	TTTATTCCCAGCCTGAAACG
Gav5	Forward	AGTCCAACCATCCTCACTGC
	Reverse	TTGGTCAAAGCTGTGCTGTC
