# Supplementary material for: Multi-Locus Phylogeographic and Population Genetic Analysis of Anolis carolinensis: Historical Demography of a Genomic Model Species
Source: PLoS One. 2012 Jun 7;7(6):e38474. doi: 10.1371/journal.pone.0038474 (PMC3369884; doi:10.1371/journal.pone.0038474)
Supplement: Table S4 — Summary statistics for all nuclear loci for the Gulf-Atlantic population. #seqs – refers to phased haplotypes. (XLS) [file pone.0038474.s005.xls]

## Sheet: Sheet1
	Summary Statistics for Gulf-Atlantic Population
	#seqs	#haps	Hd	pi	D	Fs
RALGAPA	72	3	0.082	0.00025	-1.48159	-0.837
HGMCS	96	13	0.748	0.00226	-0.18846	-1.079
MON2	106	5	0.405	0.00288	-0.14931	0.179
TERT	74	5	0.156	0.00015	-1.68429	-5.181
C1	94	6	0.534	0.00546	1.76473	1.528
R1	80	6	0.686	0.00273	1.11681	0.764
Gav1	130	4	0.105	0.0004	-1.3833	-4.016
Gav3	180	8	0.431	0.00136	-1.31937	-4.695
Gav4	210	7	0.243	0.00125	-1.49614	-5.875
Gav5	168	11	0.412	0.00324	-1.00792	-3.486
