# Supplementary material for: Multi-Locus Phylogeographic and Population Genetic Analysis of Anolis carolinensis: Historical Demography of a Genomic Model Species
Source: PLoS One. 2012 Jun 7;7(6):e38474. doi: 10.1371/journal.pone.0038474 (PMC3369884; doi:10.1371/journal.pone.0038474)
Supplement: Table S5 — Summary statistics for all nuclear loci for the Carolinas population. (XLS) [file pone.0038474.s006.xls]

## Sheet: Sheet1
	Summary Statistics for Carolinas Population
	#seqs	#haps	Hd	pi	D	Fs
RALGAPA	20	2	0.521	0.00161	2.26638	4.362
HGMCS	26	8	0.695	0.00157	-0.7596	-1.557
MON2	18	3	0.621	0.0017	1.48666	1.834
TERT	24	2	0.464	0.00043	1.23177	1.362
C1	28	3	0.204	0.00104	-1.32136	-0.674
R1	18	1	0	0
Gav1	26	3	0.674	0.00316	1.2909	1.059
Gav3	32	4	0.181	0.00041	-1.72954	-3.49
Gav4	38	1	0	0
Gav5	40	3	0.641	0.00549	1.61832	4.262
